# Supplementary material for: Removal of Chloroacetanilide Herbicides from Water Using Heterogeneous Photocatalysis with TiO2/UV-A
Source: MDPI journal article supplement (doi:10.3390/catal12060597), 2022-05-30
Supplement: s1 [file s1]

# SUPPLEMENTARY MATERIAL

## Removal of chloroacetanilide herbicides from water using heterogeneous photocatalysis with TiO<sub>2</sub>/UV-A

Nikola Roulová <sup>1</sup>, Kateřina Hrdá <sup>2</sup>, Michal Kašpar <sup>3</sup>, Petra Peroutková <sup>2</sup>, Dominika Josefová <sup>2</sup> and Jiří Palarčík <sup>2,\*</sup>

<sup>1</sup> University of Pardubice, Department of Biological and Biochemical Sciences, Studentská 573, 532 10 Pardubice, Czech Republic

<sup>2</sup> University of Pardubice, Institute of Environmental and Chemical Engineering, Studentská 573, 532 10 Pardubice, Czech Republic

<sup>3</sup> University of Pardubice, Department of Analytical Chemistry, Studentská 573, 532 10 Pardubice, Czech Republic

### CONTENTS

**Figure S1.** Estimation of dose-response curves describing the acute toxicity of metolachlor to *Chlorella kessleri* after 72h of exposure

**Figure S2.** Estimation of dose-response curves describing the acute toxicity of acetochlor to *Chlorella kessleri* after 72h of exposure

**Figure S3.** Estimation of dose-response curves describing the acute toxicity of alachlor to *Chlorella kessleri* after 72h of exposure

**Figure S4.** The dependence of the *Chlorella kessleri* growth inhibition (%) at different times of the metolachlor photocatalysis on the used catalyst and reactor vessel

**Figure S5.** The dependence of the *Chlorella kessleri* growth inhibition (%) at different times of the acetochlor photocatalysis on the used catalyst and reactor vessel

**Figure S6.** The dependence of the *Chlorella kessleri* growth inhibition (%) at different times of the alachlor photocatalysis on the used catalyst and reactor vessel

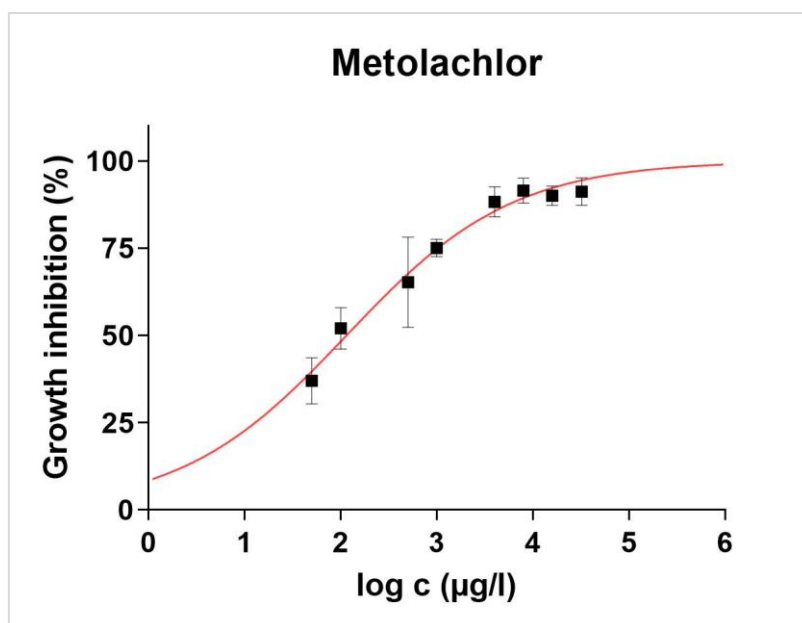

**Figure S1.** Estimation of dose-response curves describing the acute toxicity of metolachlor to *Chlorella kessleri* after 72h of exposure

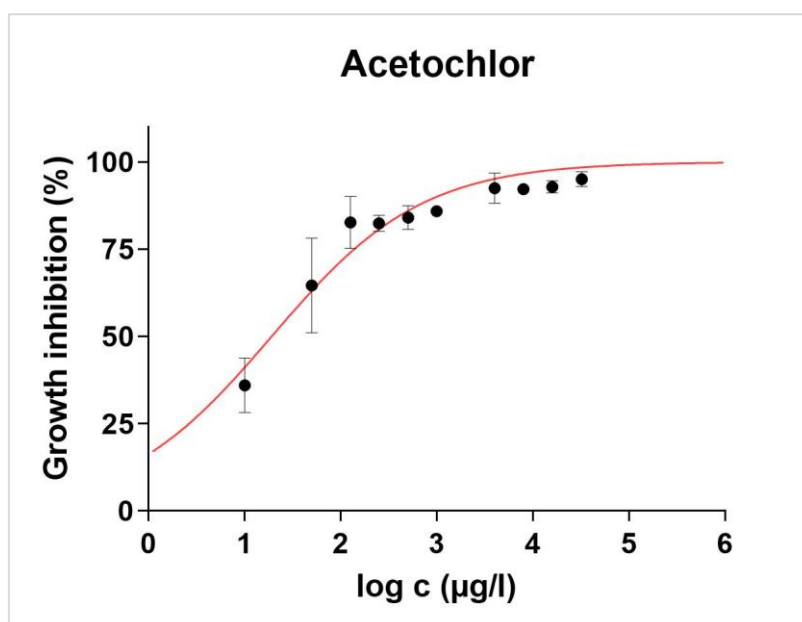

**Figure S2.** Estimation of dose-response curves describing the acute toxicity of acetochlor to *Chlorella kessleri* after 72h of exposure

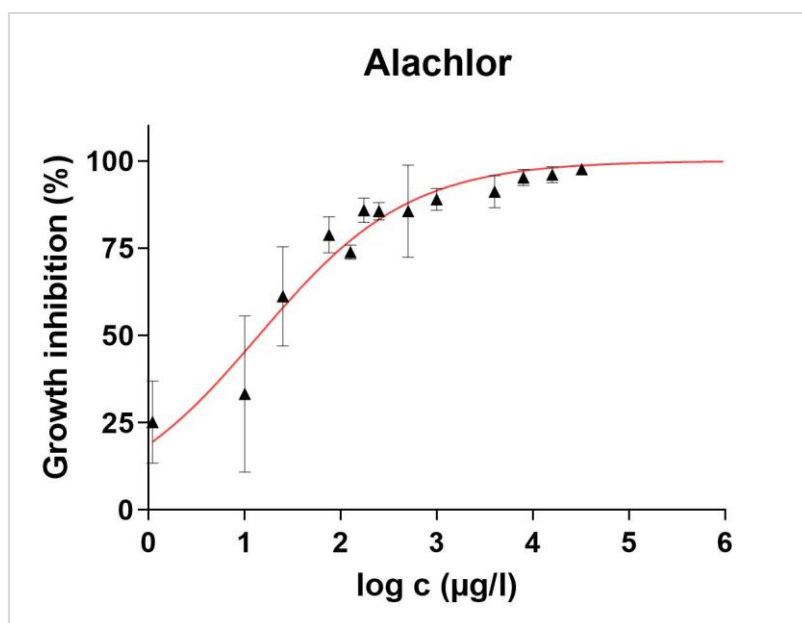

**Figure S3.** Estimation of dose-response curves describing the acute toxicity of alachlor to *Chlorella kessleri* after 72h of exposure

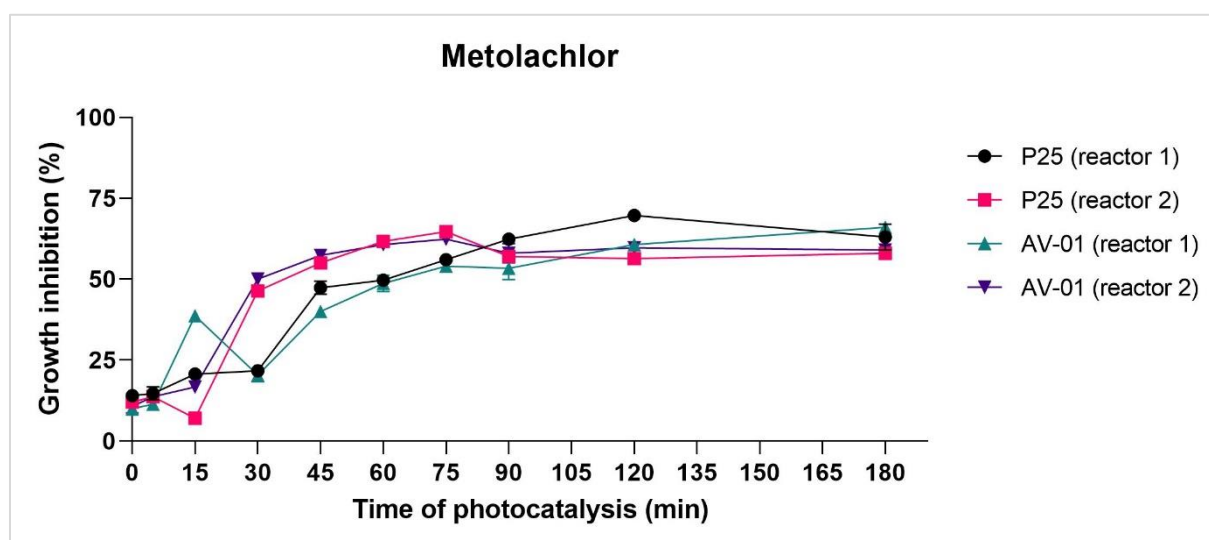

**Figure S4.** The dependence of the *Chlorella kessleri* growth inhibition (%) at different times of the metolachlor photocatalysis on the used catalyst and reactor vessel

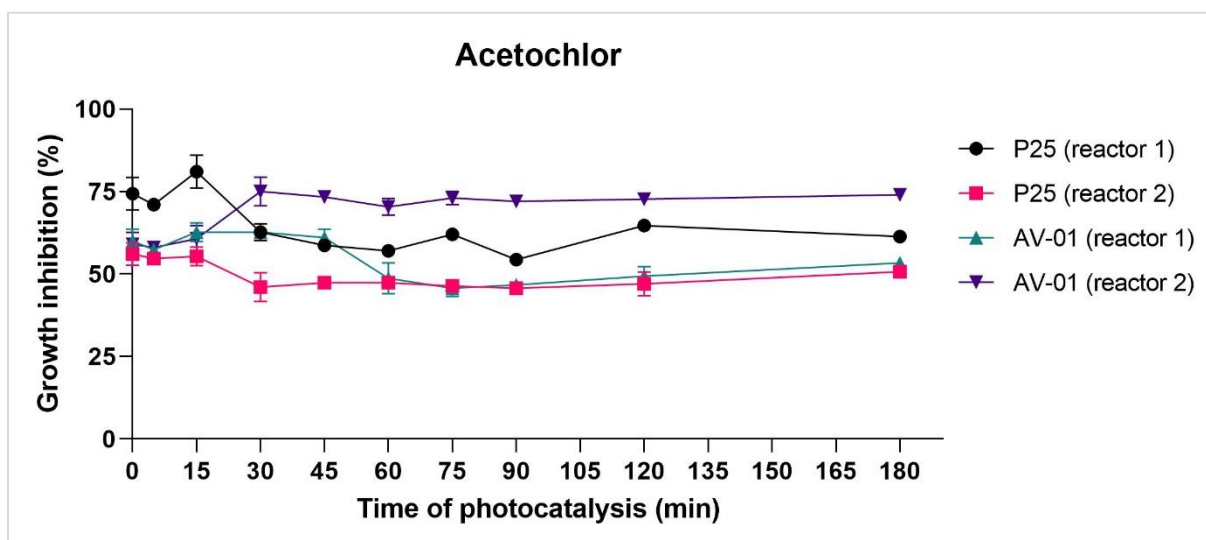

**Figure S5.** The dependence of the *Chlorella kessleri* growth inhibition (%) at different times of the acetochlor photocatalysis on the used catalyst and reactor vessel

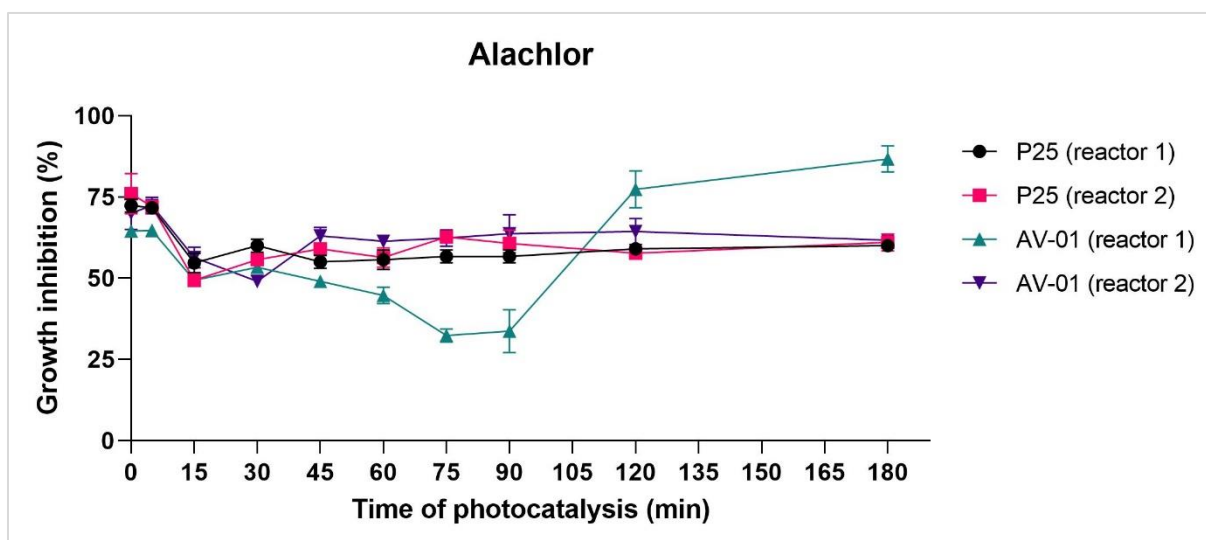

**Figure S6.** The dependence of the *Chlorella kessleri* growth inhibition (%) at different times of the alachlor photocatalysis on the used catalyst and reactor vessel
